# Supplementary material
Source: PubMed Central journal article supplement (PMC4460610)

# THE LANCET **Oncology**

## **Supplementary appendix**

This appendix formed part of the original submission and has been peer reviewed. We post it as supplied by the authors.

Supplement to: Roschewski M, Dunleavy K, Pittaluga S, et al. Circulating tumour DNA and CT monitoring in patients with untreated diffuse large B-cell lymphoma: a correlative biomarker study. *Lancet Oncol* 2015; published online April 2. [http://dx.doi.org/10.1016/S1470-2045\(15\)70106-3](http://dx.doi.org/10.1016/S1470-2045(15)70106-3).

**STEP 1a: Determine tumor-specific clonotype**

**Pre-treatment sample**

FFPE Biopsy  
or  
Serum sample

**STEP 2a: Determine ctDNA in serum**

**On study samples**

Serum samples

**Amplify VDJ with multiplex PCR and sequence**

1) Extract DNA

2) Amplify VDJ  
with multiplex  
PCR

3) Prepare for  
sequencing with  
common PCR

4) Sequence ~1M  
100bp reads

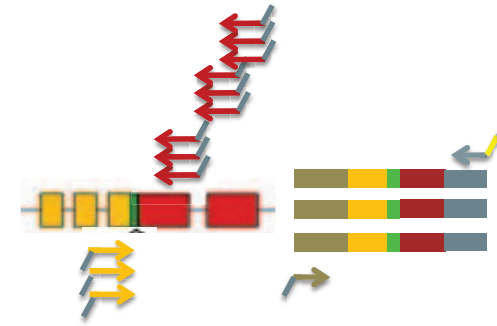

CTGGCCCCAGTAGTCATACCAACTAGCG  
TTGGCCCCAGAAATCAAGACCATCTAAA  
ACGGCCCCAGAGATCGAAGTACCAGTGT  
TTGGCCCCAGACGTCATATTGTAGTAG  
CTGGCCCCAGAAATCAGACCGCTAACA

Genomic  
DNA

PCR amplicons

Sequencing library

Sequence data

**STEP 1b: Identify lymphoma clones within B-cell repertoire**

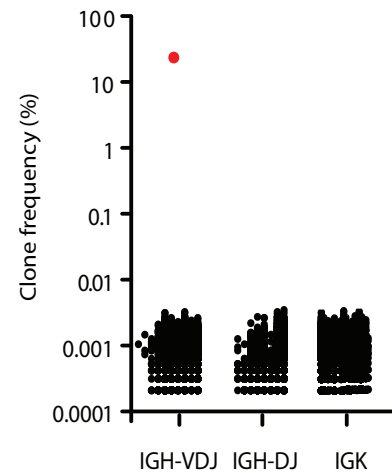

**STEP 2b: Monitor ctDNA in serial serum samples**

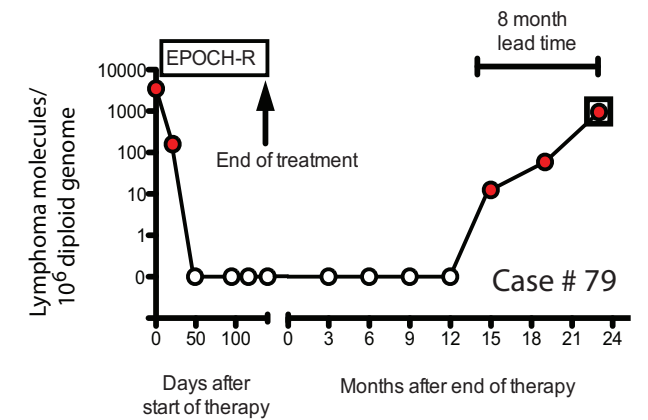

Supplement: NIHMS687691-supplement-01.pdf [file NIHMS687691-supplement-01.pdf]
